# Supplementary material for: APOE Genotype Differentially Modulates Prion Pathology in a Mouse Model
Source: Research Square preprint supplement (doi:10.21203/rs.3.rs-7820890/v1), 2025-10-30
Supplement: Supplementary file 1 [file 401c7fa90c682e9369962ab5.pdf]

Figure S1

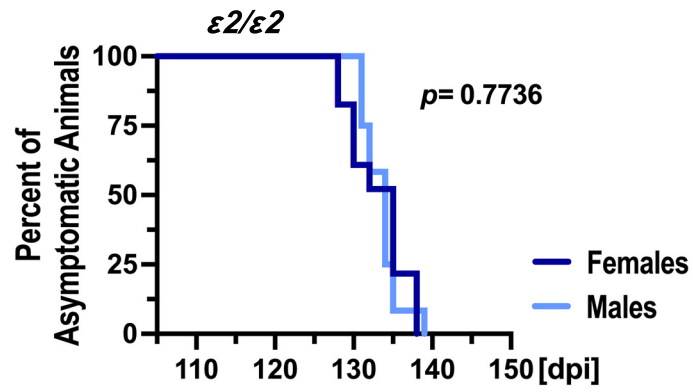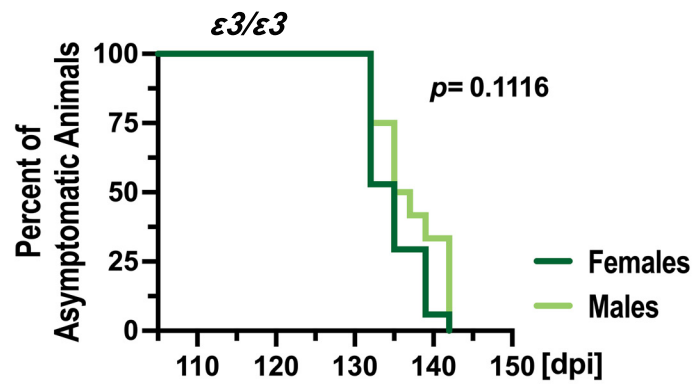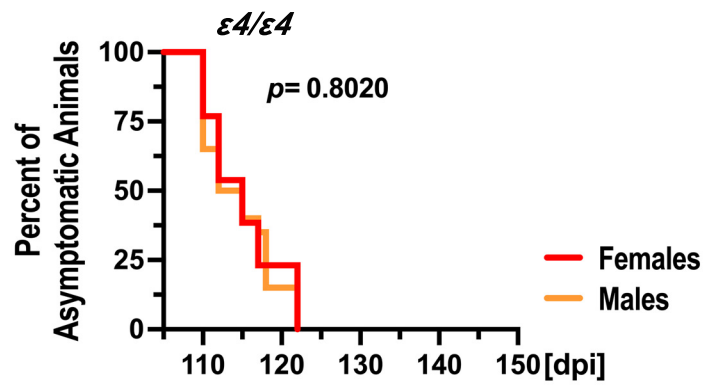

Figure S2

a

Females

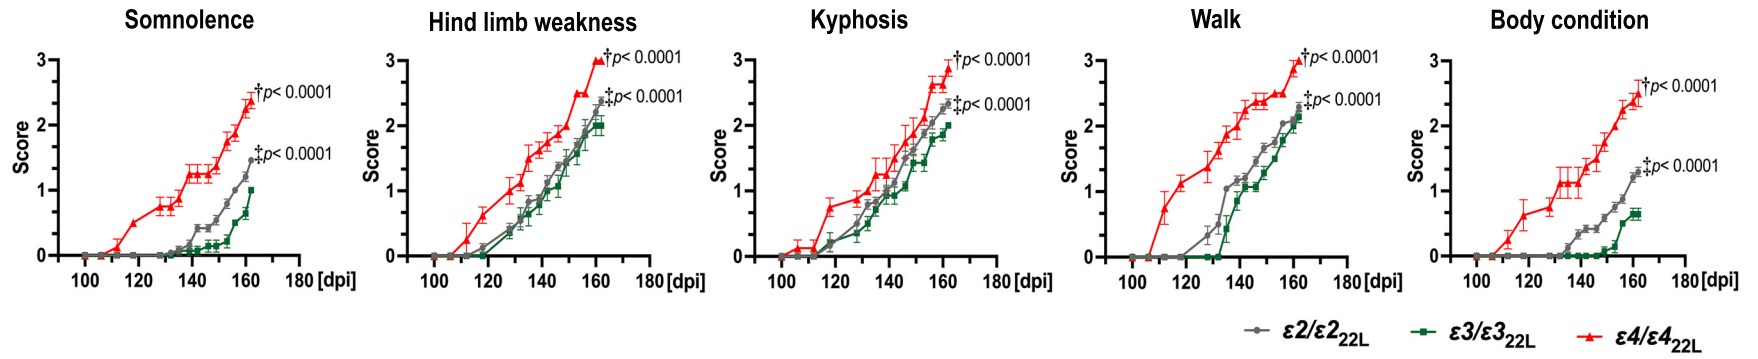

b

Males

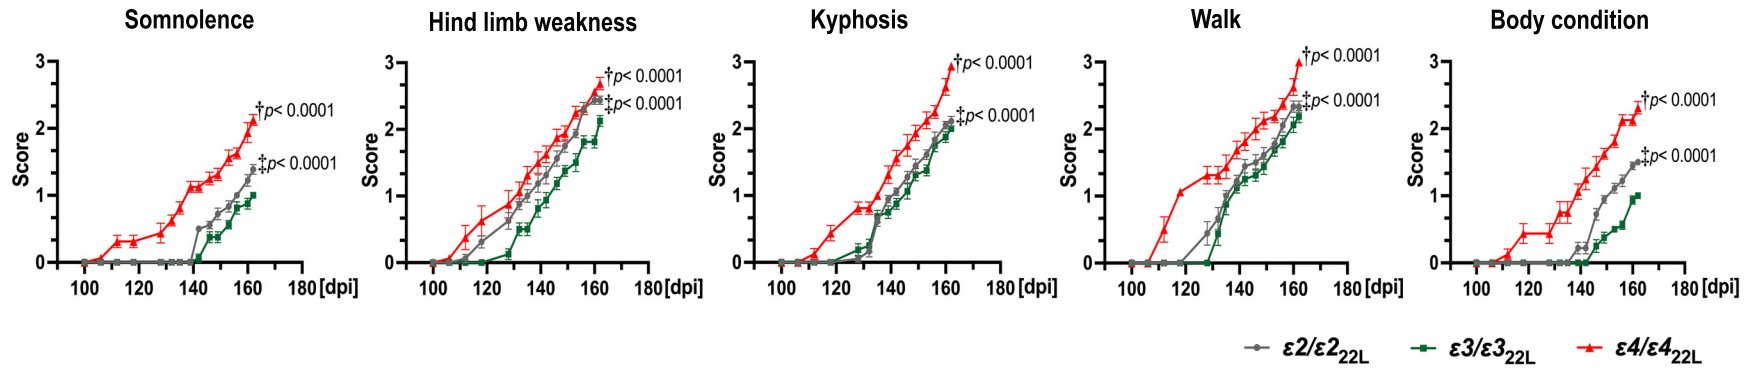

# Figure S3

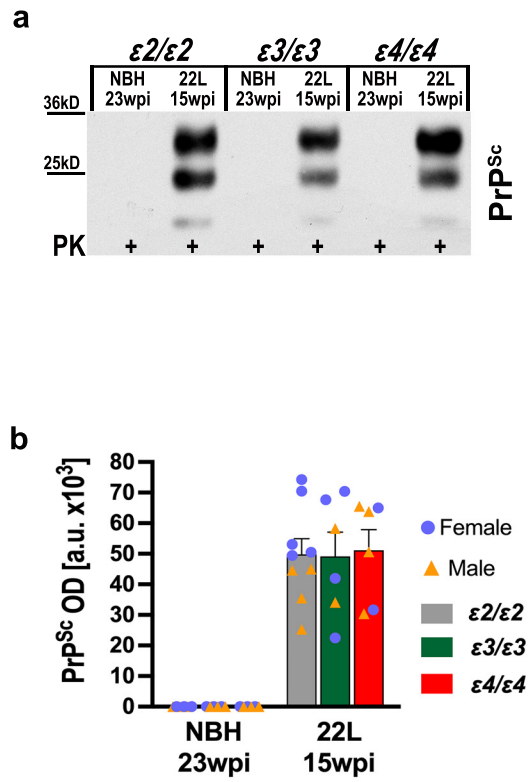

# Figure S4

a

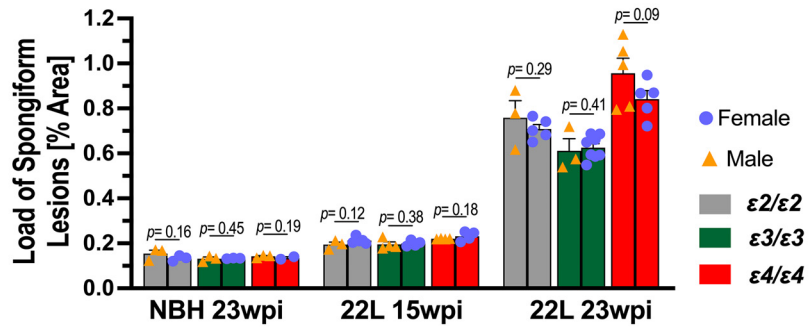

b

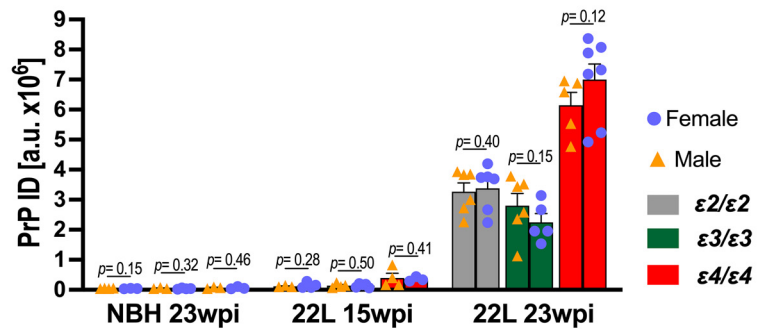

Figure S5

a

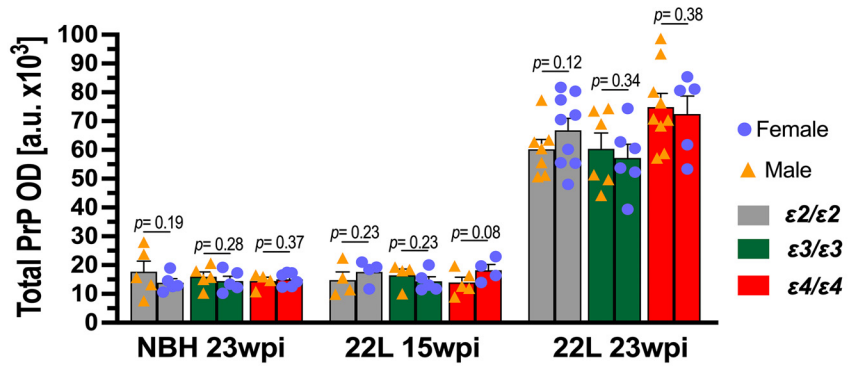

b

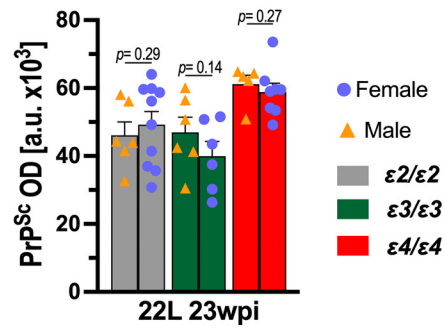

c

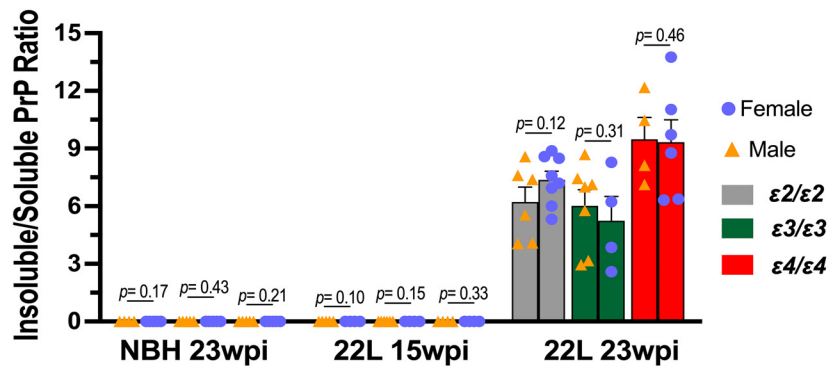

Figure S6

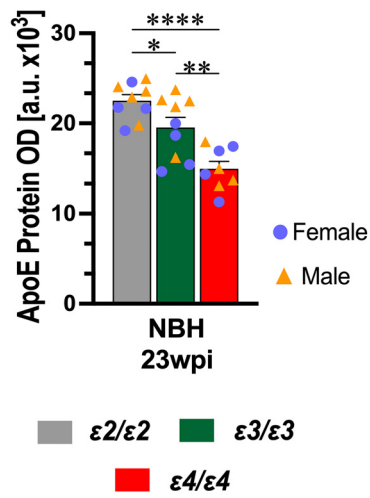

Figure S7

a

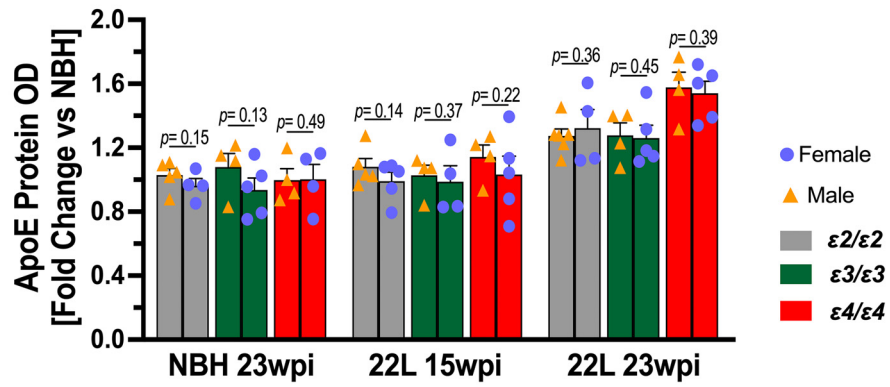

Figure S8

a

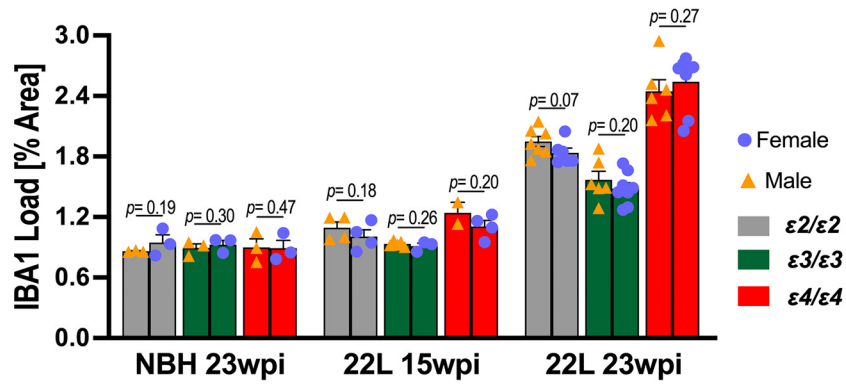

b

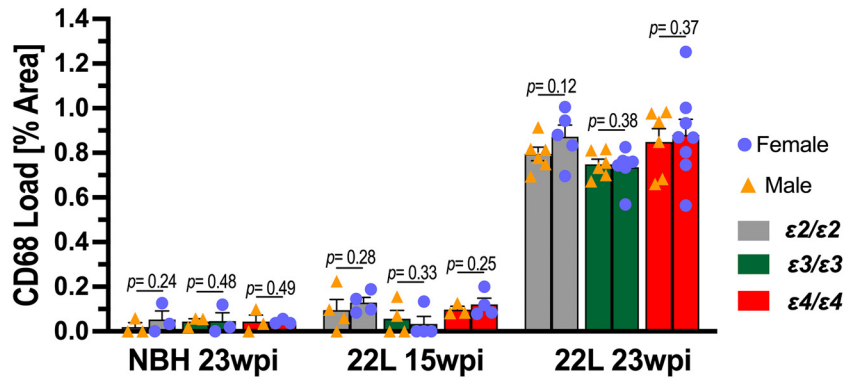



Figure S9

a

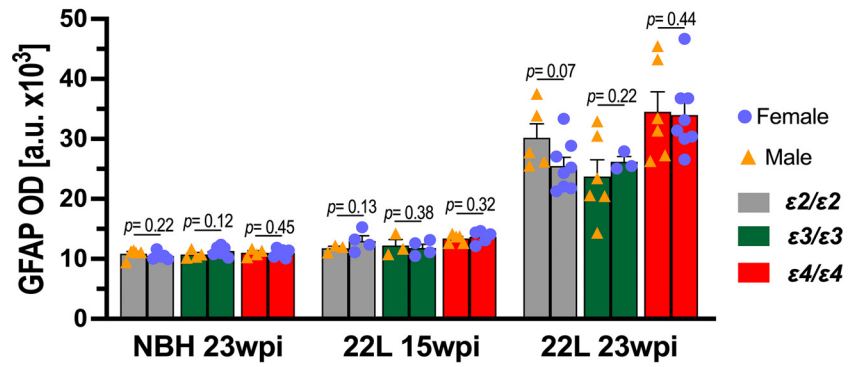

b

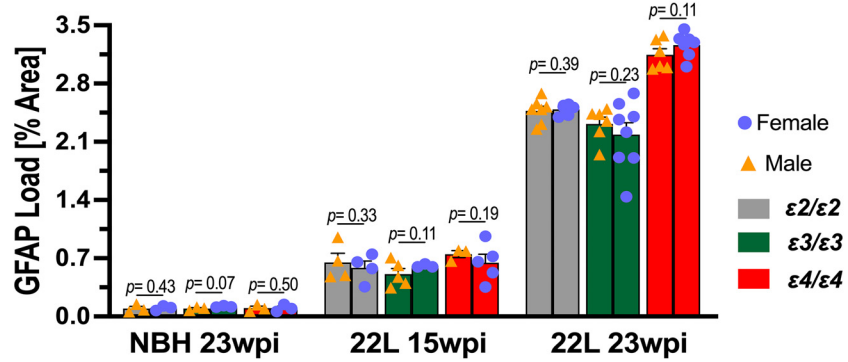

c

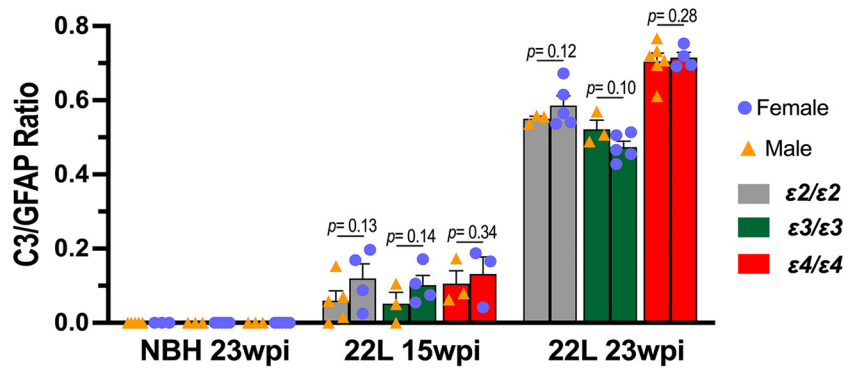

## Supplemental Figure Legend

**Figure S1. Animal sex does not affect prion disease latency time.** Shown are plots of Kaplan-Meier estimates of the prion disease latency time in female and male mice of indicated *APOE* genotypes, which were inoculated with 22L scrapie strain. The x-axis in all graphs displays the number of days post inoculation (dpi). The Kaplan-Meier estimates were derived from 12 to 23 mice per group. *p* values of the Log-Rank test comparing 22L inoculated female and male mice for matching *APOE* genotypes are indicated in the graphs.

**Figure S2. *APOE* genotype differentially affects severity and progression of prion disease symptoms.** Shown are plots of scorable behavioral characteristics, which contribute to the Total Scrapie Score in 22L infected (a) female and (b) male mice of indicated *APOE* genotypes. These characteristics include somnolence, hind limb weakness, kyphosis, walk, and body condition and they are scored based on the following criteria: 0 = normal, 1 = subtle, 1.5 = mild, 2 = moderate, 2.5 = advanced, and 3 = severe. Their sum makes the Total Scrapie Score shown in Fig. 1a. The x-axis in all graphs displays number of days post inoculation (dpi). Mice were serially assessed starting from the 100<sup>th</sup> dpi by two independent examiners blinded to the animal genotype. Values represent mean  $\pm$  SEM from 4 - 12 animals per group. †*p* < 0.0001 denotes the significance for pairwise comparison between  $\epsilon 4/\epsilon 4_{22L}$  and  $\epsilon 3/\epsilon 3_{22L}$  or  $\epsilon 2/\epsilon 2_{22L}$  animals, while ‡*p* < 0.0001 for the comparison between  $\epsilon 2/\epsilon 2_{22L}$  and  $\epsilon 3/\epsilon 3_{22L}$  animals (repeated measures ANOVA).

**Figure S3. *APOE* genotype does not affect accumulation of PrP<sup>Sc</sup> in the lymphoreticular system in prion infected animals.** (a) Immunoblot analysis of proteinase K (PK) resistant PrP<sup>Sc</sup> and (b) densitometric quantification of PrP<sup>Sc</sup> band optical densities (OD) in the spleen homogenate in mice of indicated *APOE* genotypes, which were infected with 22L scrapie strain and killed 15 weeks post inoculation (wpi). Included are PK-treated samples of spleen

homogenate from animals inoculated with normal brain homogenate (NBH), which show no evidence for the PK-resistant PrP<sup>Sc</sup> conformer. **(b)** Values represent mean + SEM from 6 to 9 mice per group along with data points for single female and male animals.  $p= 0.9779$  (one-way ANOVA).

**Figure S4. Animal sex does not significantly affect pathology burden in prion disease**

Shown is comparison of **(a)** the spongiform lesion load in the M1 cortex and **(b)** values of the integrated density (ID) of anti-PrP immunostaining in the S1 cortex between female and male mice for matching *APOE* genotype, inoculum, and survival time. Unpaired *t*-test with Welch's correction was used to test for inter-sex significance. Values represent mean + SEM from 2 to 8 animals per group along with data points for single female and male animals. *t*-test values are shown directly above the groups compared.

**Figure S5. Animal sex does not influence brain levels of the PrP protein and PrP solubility.**

Shown is comparison of the protein band optical density (OD) values for **(a)** the total PrP protein, **(b)** the PrP<sup>Sc</sup> conformer, and **(c)** the insoluble / soluble PrP ratio between female and male mice for matching *APOE* genotype, inoculum, and survival time. Unpaired *t*-test with Welch's correction was used to test for inter-sex significance. Values represent mean + SEM from 4 to 10 animals per group along with data points for single female and male animals. *t*-test values are shown directly above the groups compared.

**Figure S6. *APOE* genotype differentially affects apoE protein level in the brain in non-**

**infected animals.** Shown is densitometric quantification of apoE protein band optical densities (OD) in the brain homogenate, in mice of indicated *APOE* genotypes, which were inoculated with normal brain homogenate (NBH). Corresponding immunoblot analysis of the apoE protein is presented in Figure 4a. Shown are mean values + SEM from 8 to 9 mice per *APOE* genotype

along with data points for single female and male animals.  $p < 0.0001$  (one-way ANOVA);  $*p < 0.05$ ,  $**p < 0.01$ ,  $****p < 0.0001$  (Holm's-Sidak's post hoc test).

**Figure S7. Animal sex does not influence changes in the apoE protein level during prion infection.** Shown is comparison of the apoE protein band optical density (OD) values between female and male mice for matching *APOE* genotype, inoculum, and survival time. Unpaired *t*-test with Welch's correction was used to test for inter-sex significance. Values represent mean + SEM from 4 to 6 animals per group along with data points for single female and male animals. *t*-test values are shown directly above the groups compared.

**Figure S8. Animal sex does not significantly affect microglia activation during prion infection.** Shown is comparison of (a) IBA1 and (b) CD68 positive microglia load in the S1 somatosensory cortex between female and male mice for matching *APOE* genotype, inoculum, and survival time. Unpaired *t*-test with Welch's correction was used to test for inter-sex significance. Values represent mean + SEM from 3 to 8 animals per group along with data points for single female and male animals. *t*-test values are shown directly above the groups compared.

**Figure S9. Animal sex does not significantly affect prion-related astrogliosis.** Shown is comparison of (a) GFAP band optical densities (OD) values, (b) GFAP positive astrocyte load in the S1 somatosensory cortex, and (c) the C3/GFAP load ratio between female and male mice for matching *APOE* genotype, inoculum, and survival time. Unpaired *t*-test with Welch's correction was used to test for inter-sex significance. Values represent mean + SEM from 3 to 8 animals per group along with data points for single female and male animals. *t*-test values are shown directly above the groups compared.
