# Supplementary material for: APOE Genotype Differentially Modulates Prion Pathology in a Mouse Model
Source: Research Square preprint supplement (doi:10.21203/rs.3.rs-7820890/v1), 2025-10-30
Supplement: Supplementary file 2 [file 5b337d1c9fafbdceb44bdae7.pdf]

Figure S10

a

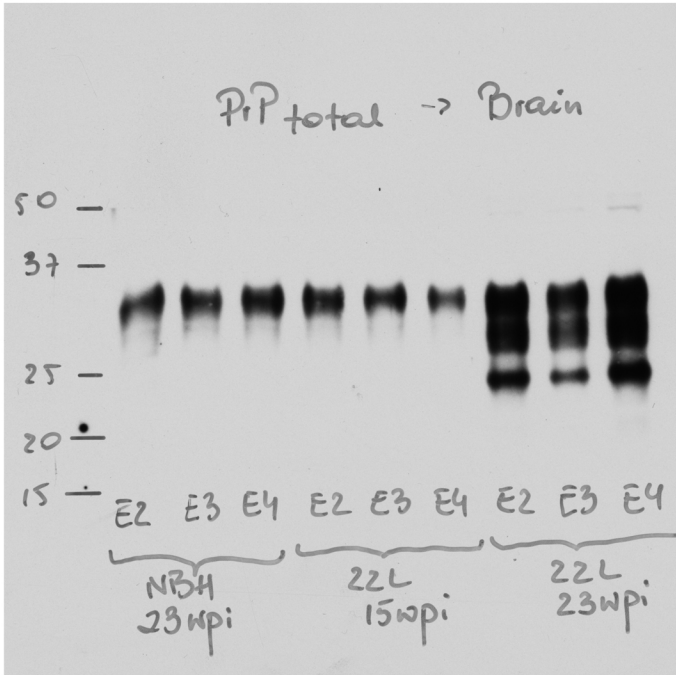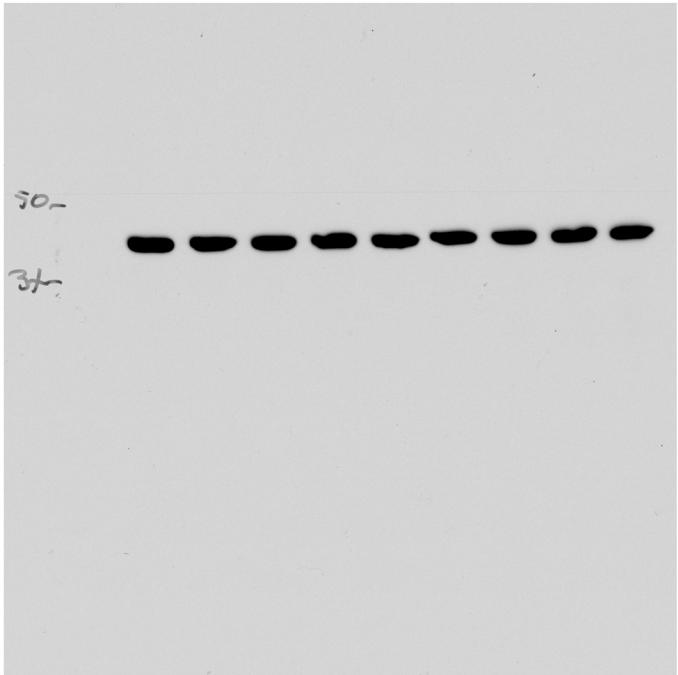

b

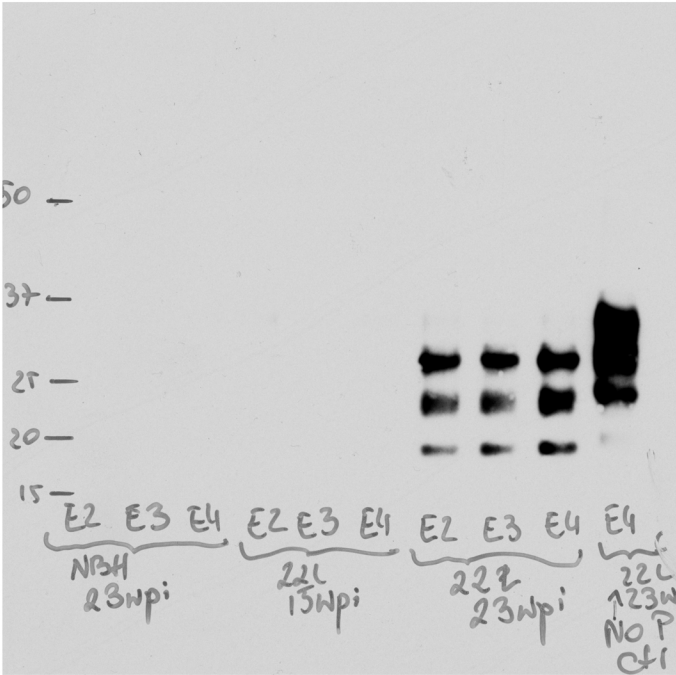

c

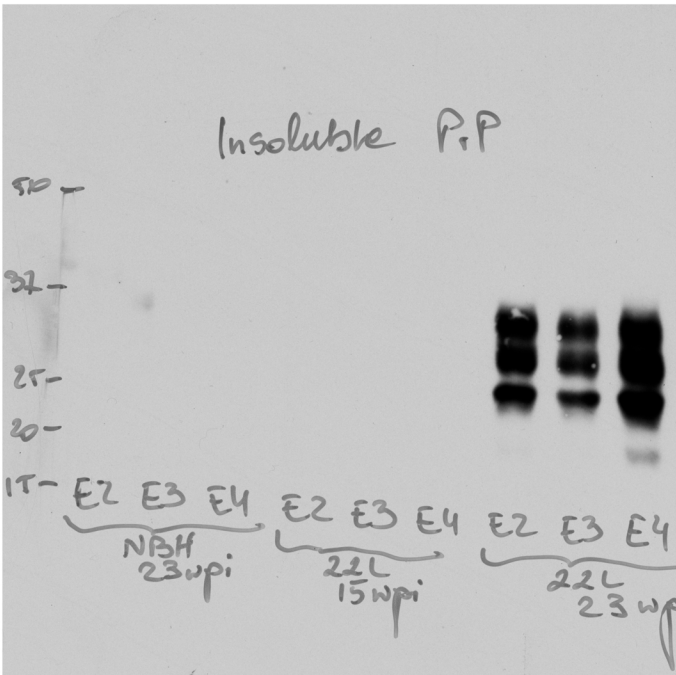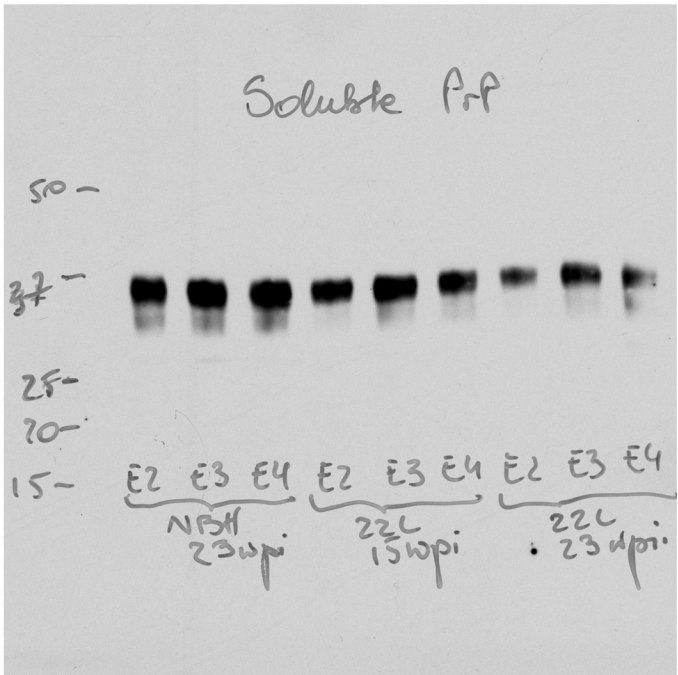



Figure S11

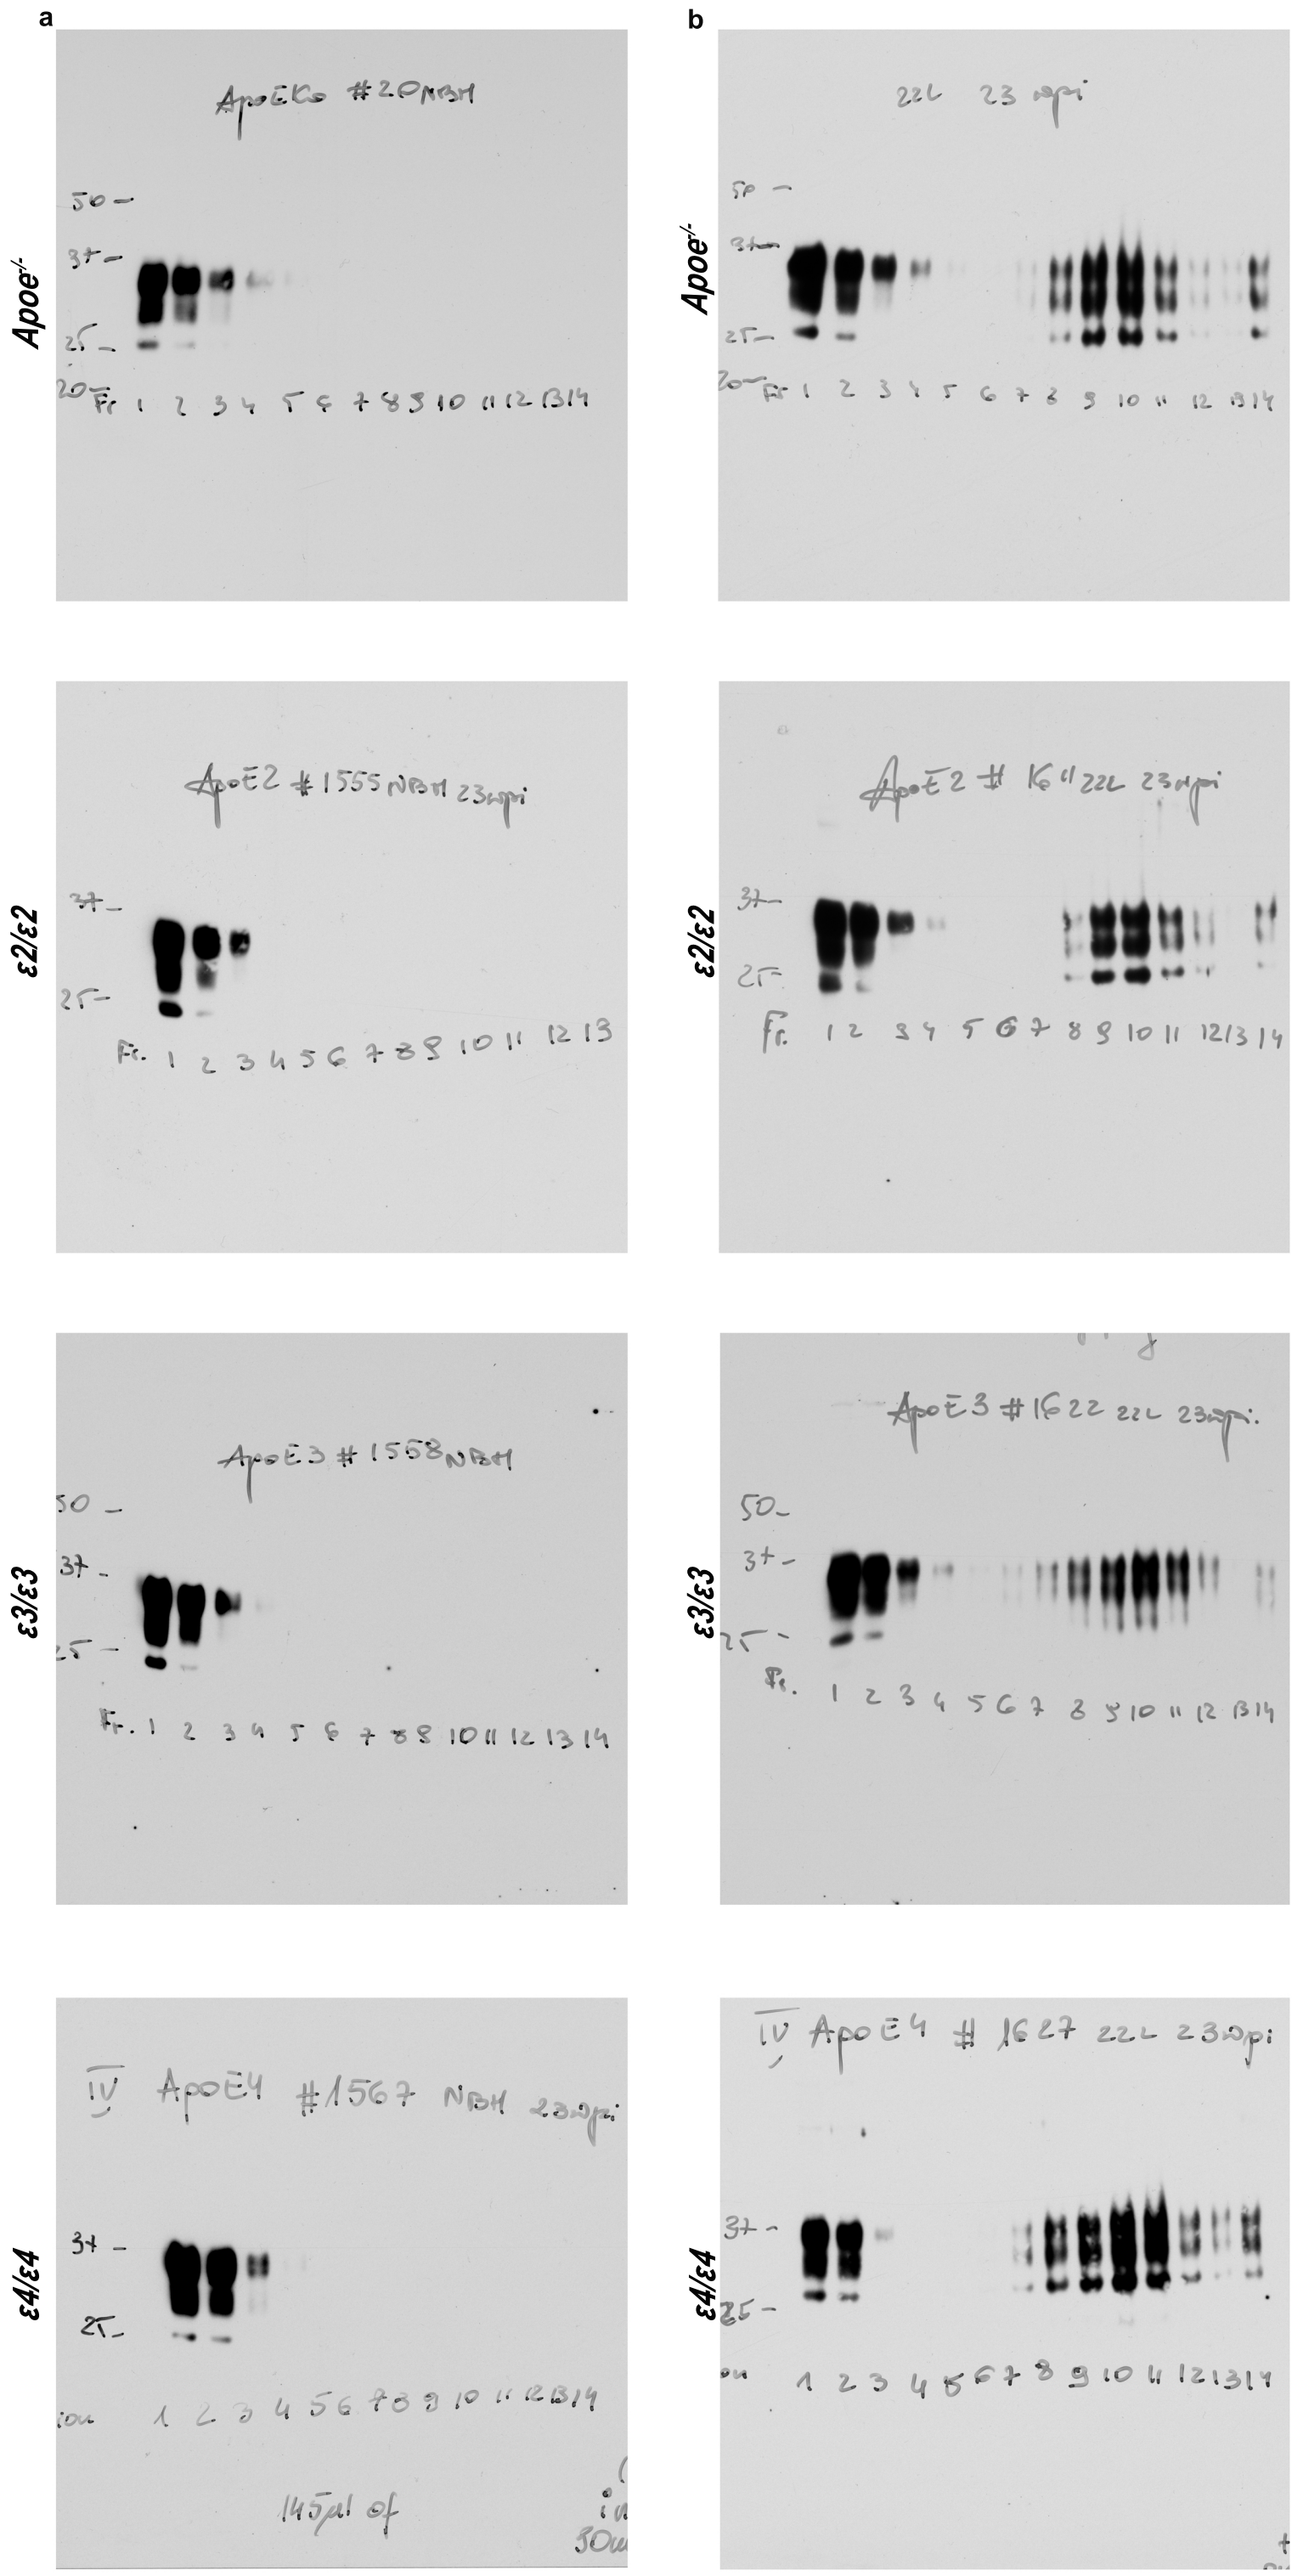



Figure S12

a

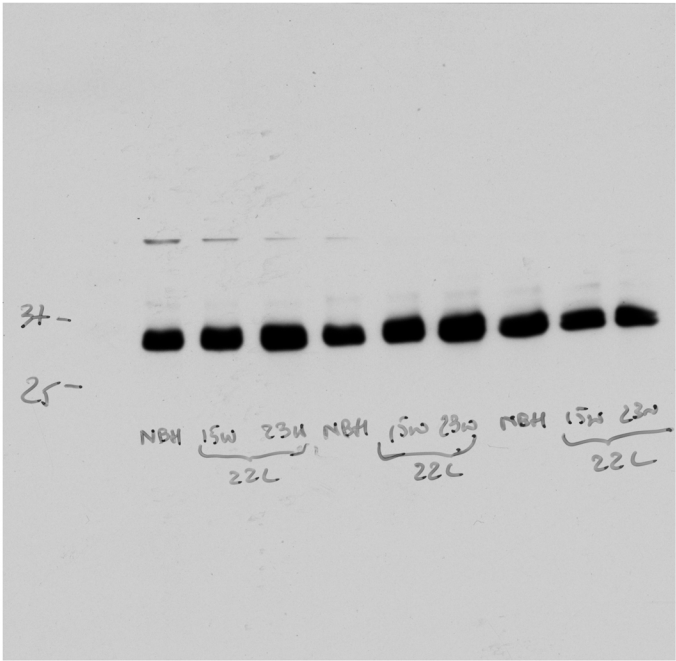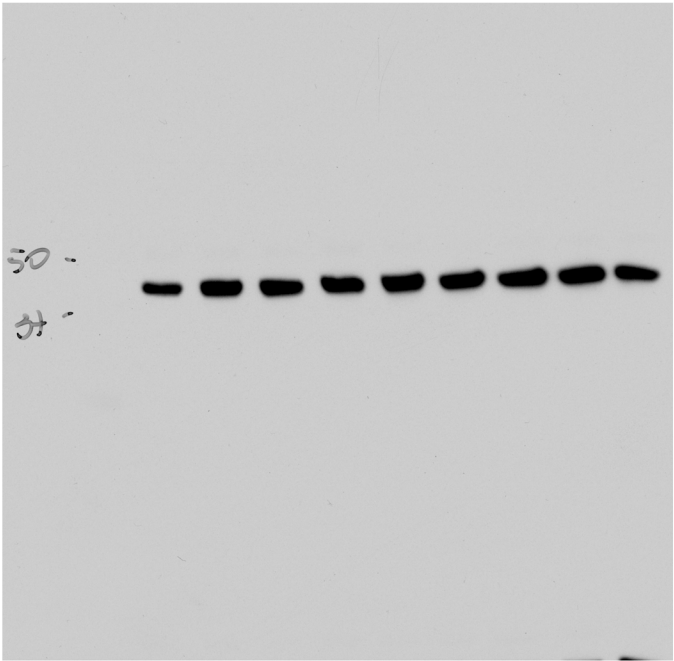

b

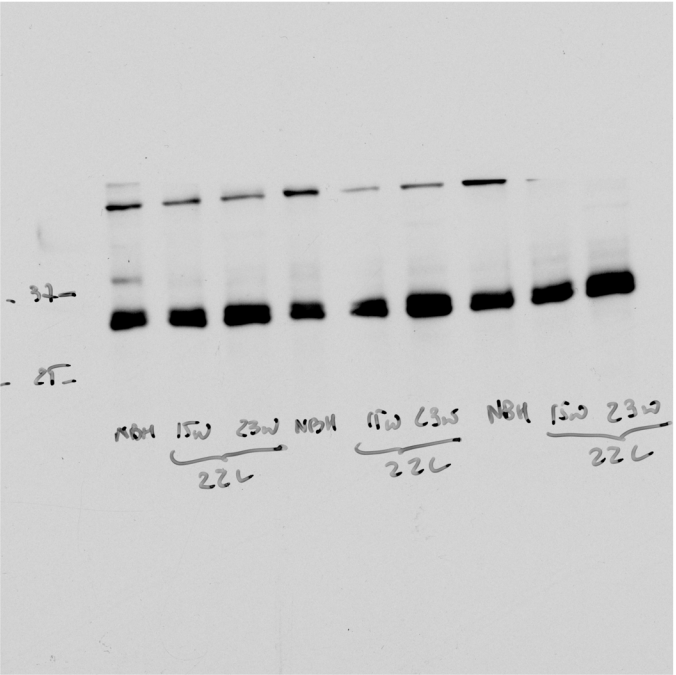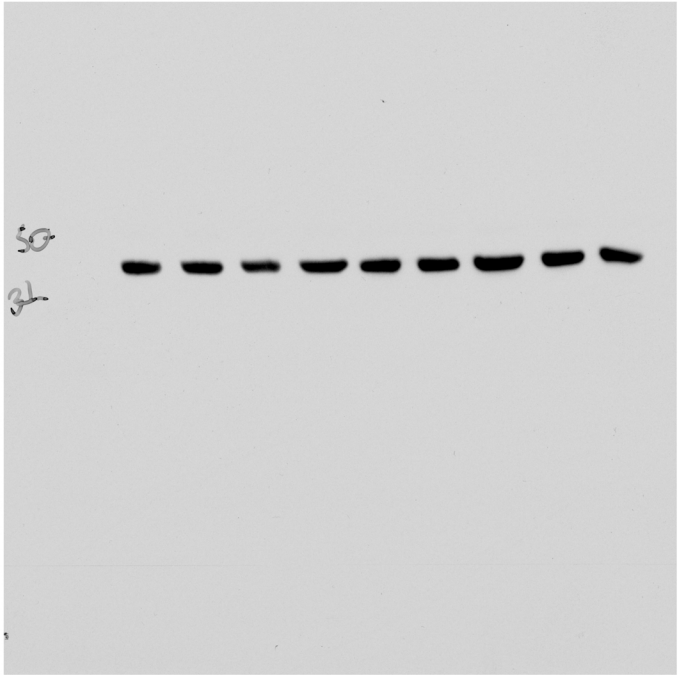

c

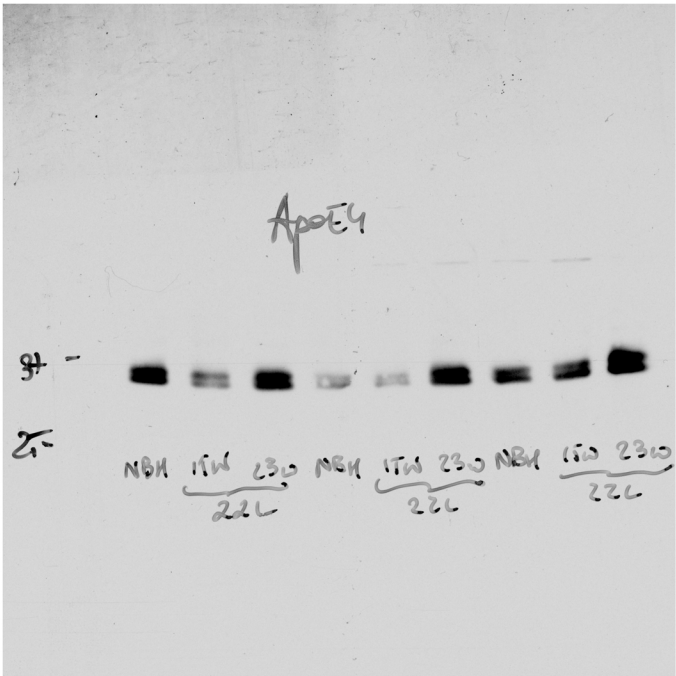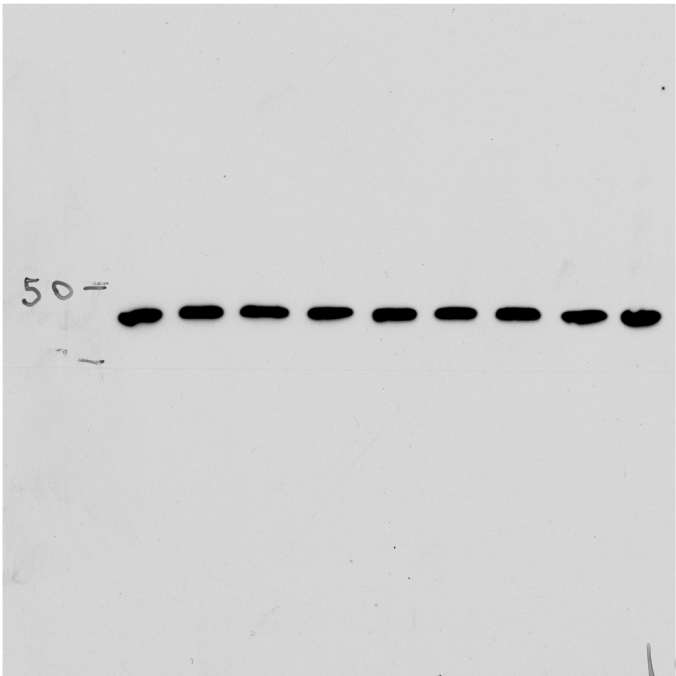



Figure S13

a

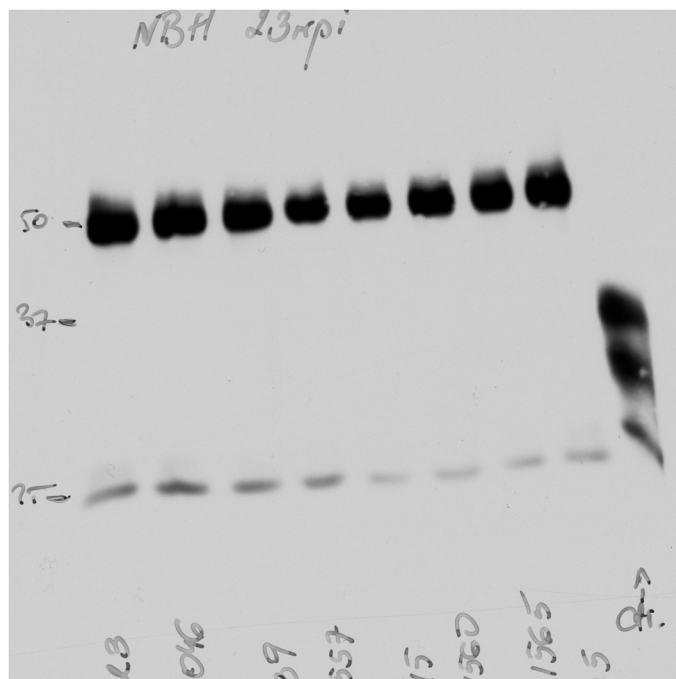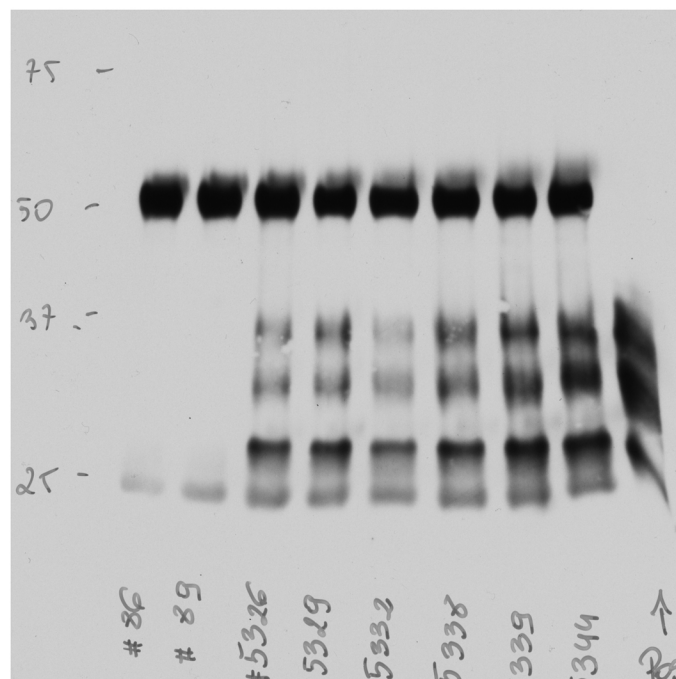

b

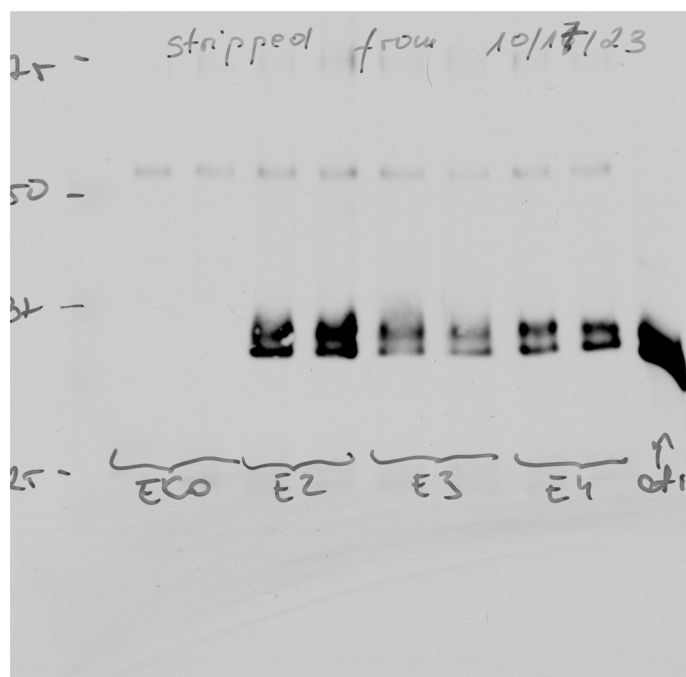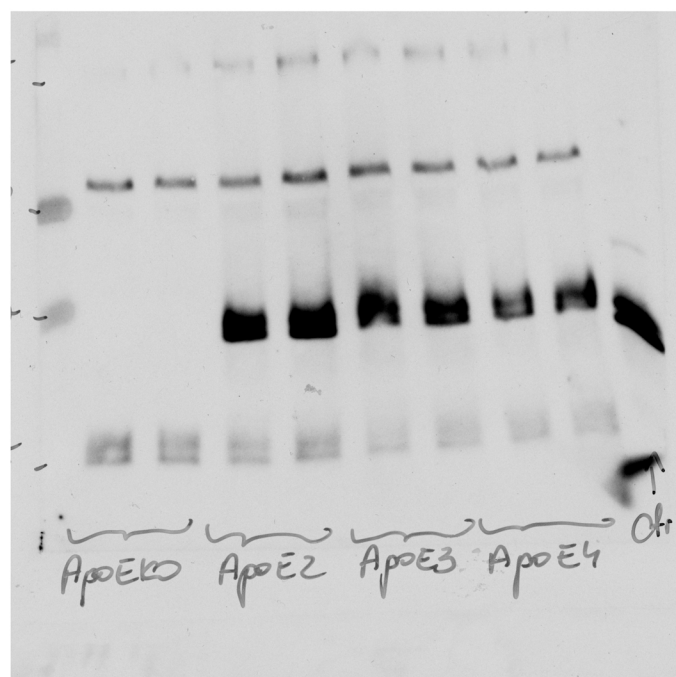

**Figure S14**

**a**

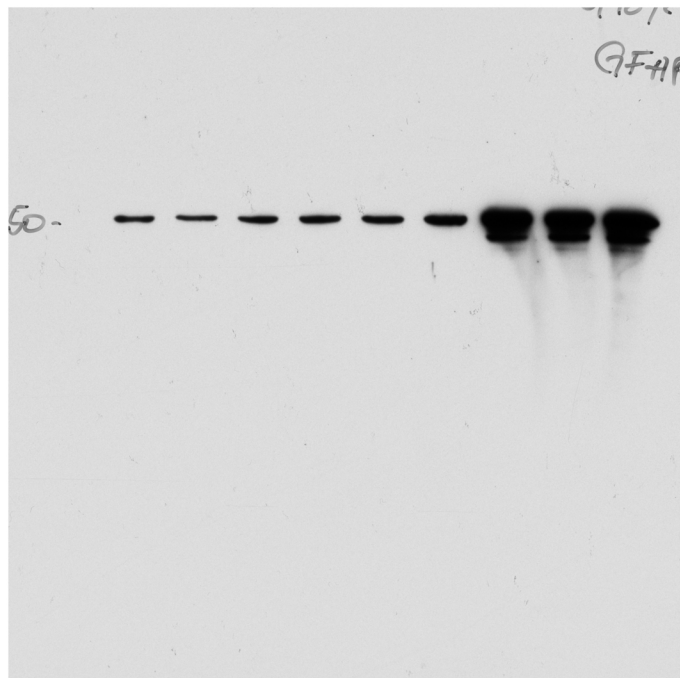

**b**

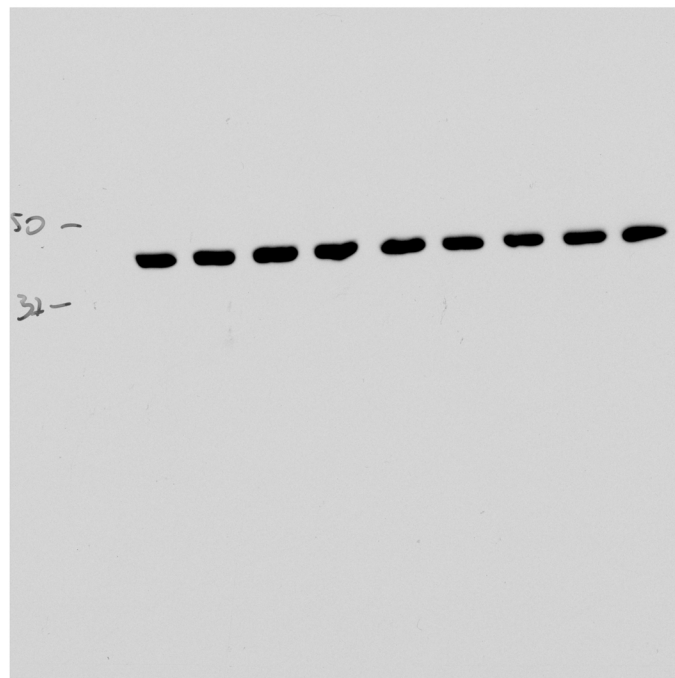



Figure S15

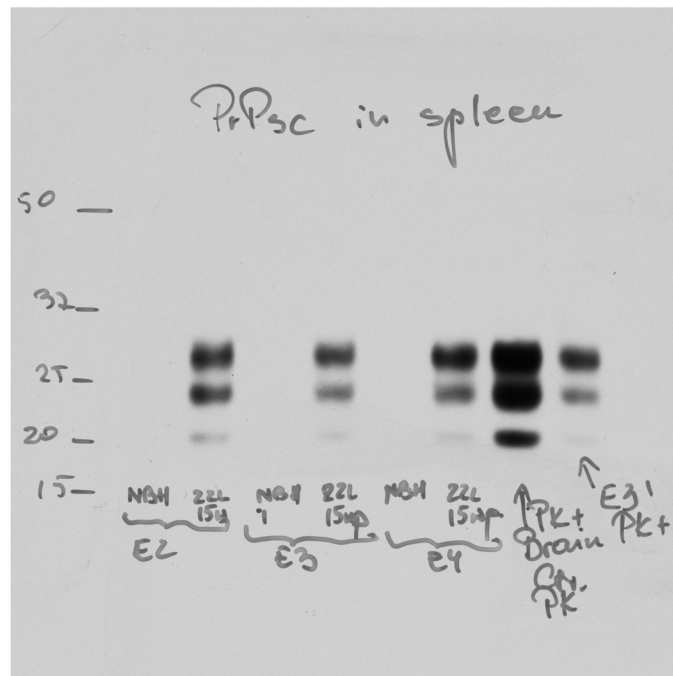

**Figure S10.** Shown are uncropped Western immunoblots of **(a)** total PrP and  $\beta$ -actin, **(b)** proteinase K resistant PrP<sup>Sc</sup> conformer, and **(c)** detergent insoluble and soluble PrP fractions, which were used to prepare Figures 2 a, 2 c, and 2 e, respectively.

**Figure S11.** Shown are uncropped Western immunoblots of PrP protein in 14 brain homogenate fractions in mice inoculated with **(a)** normal brain homogenate and **(b)** 22L scrapie strain, which were used to prepare Figures 3 a and 3 b, respectively.

**Figure S12.** Shown are uncropped Western immunoblots of apoE protein (left panel) and  $\beta$ -actin (right panel) in brains of **(a)**  $\epsilon 2/\epsilon 2$ , **(b)**  $\epsilon 3/\epsilon 3$  and **(c)**  $\epsilon 4/\epsilon 4$  mice, which were used to prepare Figure 4 a.

**Figure S13.** Shown are uncropped Western immunoblots of **(a)** PrP and **(b)** apoE, which were used to prepare Figure 4 c.

**Figure S14.** Shown are uncropped Western immunoblots of **(a)** GFAP and **(b)**  $\beta$ -actin, which were used to prepare Figure 7 a.

**Figure S15.** Shown is uncropped Western immunoblot of proteinase K resistant PrP<sup>Sc</sup> conformer in the lymphoreticular system, which was used to prepare Figure S3.
